1 **Article title:** Reward priming differentially modulates enhancement and inhibition in

2 auditory decision-making

3 **List of author names:** Hidekazu Nagamura<sup>1</sup>, Hiroshi Onishi<sup>1</sup>, Momoko Hishitani<sup>1</sup>,

4 Shota Murai<sup>1</sup>, Yuma Osako<sup>2</sup>, and Kohta I. Kobayasi<sup>1</sup>

5 **Author affiliations:**

6 <sup>1</sup>Graduate School of Life and Medical Sciences, Doshisha University, Japan

7 <sup>2</sup>Graduate School of Brain Science, Doshisha University, Japan

8

## 9 **Abstract**

10 In cognitive sciences, rewards, such as money and food, play a fundamental role in  
11 individuals' daily lives and well-being. Moreover, rewards that are irrelevant to the task  
12 alter individuals' behavior. However, it is unclear whether explicit knowledge of reward  
13 irrelevancy has an impact on reward priming enhancements and inhibition. In this study,  
14 an auditory change-detection task with task-irrelevant rewards was introduced. The  
15 participants were informed explicitly in advance that the rewards would be given  
16 randomly. The results revealed that while inhibition related to reward priming only  
17 occurred when the participants were explicitly informed about rewards, implicit  
18 instruction thereof resulted in enhancement and inhibition associated with reward  
19 priming. These findings highlight the contribution of explicit information about rewards  
20 associated with auditory decisions.

21

22      Keywords: Auditory attention, Perceptual decision-making, Reward priming

23

## 24 **1. Introduction**

25 Rewards have a considerable impact on individuals' daily lives. For instance,  
26 performances typically improve when individuals are rewarded substantially for good  
27 work. Therefore, it is imperative to address the underlying reward mechanisms that help  
28 individuals in performing efficiently.

29 Individuals' behavior is influenced when rewards are not associated with the current  
30 task. For instance, when stimuli that were previously associated with rewards but are  
31 currently independent are presented, participants' responses have been noted to be slower  
32 [1–5]. Moreover, Hickey et al. [6] revealed that a stimulus presented with a reward in the  
33 previous trial distorted the attentional process while rewards were independent of  
34 stimulus and actual performance. This previous reward bias, that is, reward priming, is  
35 believed to comprise a probabilistic association between the stimulus and reward [7].

36 However, the causes of the reward priming remain very ambiguous. In previous studies,  
37 participants have not always been informed that the reward was not associated with the  
38 current task goal. Therefore, it has been unclear whether reward priming is driven by  
39 explicit reward information. Numerous studies revealed that rewards given randomly that  
40 the participants knew about had different effects in comparison to contingent or  
41 performance-independent rewards in cognitive control and learning [8–11]. Information

42 related to reward randomness may be an important aspect of reward priming.

43 Accordingly, the purpose of this study was to investigate the effects of reward priming  
44 on auditory decisions. To elucidate explicit information effects on reward priming,  
45 participants were informed that they would be rewarded randomly for correct answers. In  
46 addition, whether reward priming applied to auditory tasks and perceptual  
47 decision-making was investigated.

48

## 49 **2. METHODS**

### 50 **2.1 Participants**

51 The participants comprised 16 healthy students (8 females, 22–26 years old) who all  
52 provided informed consent. They all had normal or corrected-to-normal vision and  
53 normal hearing. The study was approved by the ethics board of Doshisha University.

### 54 **2.2 Stimuli**

55 The stimulus was a 2300–3000 ms auditory stimulus that comprised two tone burst  
56 sequences and white noise (Fig. 1A). The frequencies of each tone burst sequence (Tone  
57 A, B) were 1000 and 500 Hz, with stimulus lengths of 155 and 99 ms and inter-stimulus  
58 time intervals of 93 and 74 ms. These sequences were employed to simulate the time  
59 structure of natural sounds [12]. While the maximum sound pressure level of the stimulus

60 was 74 dB SPL, the rise and fall of the tone bursts were both set to 5 ms. Matlab  
61 (MathWorks, Inc., Natick, MA, USA) was employed to process the auditory stimuli. The  
62 timing of the *disappearance* of the experimental stimulus was defined as the offset of the  
63 inter-stimulus interval immediately following the disappearance of the tone burst  
64 sequence. The onset of the next tone burst was expected to be the earliest to detect the  
65 disappearance of the tone burst sequence. The white noise disappeared 1500 ms after the  
66 tone burst sequence disappeared.

### 67 **2.3 Procedure**

68 The auditory change detection task was employed to create a unique two-alternative  
69 forced-choice (2AFC) task in order to examine the effect of reward priming (Fig. 1B).  
70 The participants were first required to look at a gazing point that was displayed at the  
71 center of the screen. After presenting the gazing point for 1000 ms, the experimental  
72 stimulus was presented. Subsequently, between 800 and 1500 ms after the presentation,  
73 either Tone A or B disappeared (Fig. 1A). The participants were then asked to as soon as  
74 possible answer which tone had disappeared. The reaction time was defined as 1500 ms  
75 after the disappearance of the presented stimulus. Accordingly, any response before the  
76 disappearance of the stimulus or outside the reaction time was deemed an incorrect  
77 answer. If the participants answered correctly, they earned 0, 1, or 5 points randomly. One

78 of these numbers and the change of total score were displayed at the center of the screen.  
79 If the participants answered incorrectly, they did not earn any points. The word *Incorrect*  
80 and the total score were displayed at the center of the screen. Finally, the participants  
81 were rewarded in accordance with their total score. Practice consisted of 60 trials without  
82 scoring and 12 trials with scoring, followed by three sessions of 120 trials in the test  
83 experiment. The Presentation software package (Neurobehavioral Systems, Inc., Albany,  
84 CA, USA) was employed to program the experiment.

## 85 **2.4 Analysis**

86 To exclude inter-participant variability, data for individual trials were converted to  
87 z-scores for each participant. To examine the association between stimulus and reward,  
88 reaction time was analyzed by determining whether the stimulus was the same as the  
89 previous one (Fig. 2). The details thereof are discussed in the Results section. The  
90 statistical analyses of behavioral data for Kendall correlation test and paired t-test were  
91 conducted in Python with the package Pingouin [13].

## 92 **3 RESULTS**

93 All the participants ( $n = 16$ ) performed the task well (Fig. 3) and their reaction times  
94 were not influenced by the current reward ( $r = 0.011$ ,  $p > 0.1$ , Kendall correlation test; Fig.  
95 4) because the rewards were not associated with stimuli. On the contrary, when the

96 previous trial reward had a high value, the participants were slower ( $r = 0.38, p < 0.001$ ,  
97 Kendall correlation test; Fig. 5), thereby revealing that reward priming influences  
98 decisions even when the participants were informed explicitly that the rewards were  
99 unrelated to the task. The effects of both previous and the current trial stimuli were tested  
100 (Fig. 2). The results revealed that their reaction times were slower when the stimulus was  
101 the same as the previous trial than when it was different ( $t(15) = 4.17, p < 0.001$ , paired  
102 t-test; Fig. 6). This is contradictory to previous results like sequential effect [14]. This  
103 strange phenomenon may be caused by the experiment design, such as detecting the  
104 disappearance of the stimulus and tone burst sequences. Moreover, when the current  
105 stimulus differed from the previous one, based on the extent of the previous reward, the  
106 response speeds were slower. However, when the current stimulus was the same as the  
107 previous one, there was no difference in reaction times in comparison to the previous  
108 reward size ( $r = 0.18, p > 0.1$ , and  $r = 0.38, p < 0.01$ , respectively, Kendall correlation test  
109 with Bonferroni correction; Fig. 7 blue and orange line).

#### 110 **4 DISCUSSION**

111 This study demonstrated that reward priming distorted the decision process even  
112 when participants were informed explicitly that rewards were irrelevant to the task. In  
113 particular, reward priming slowed their responses when the stimulus was the same as in



114 the one in the previous trial but did not accelerate such when the stimulus was different  
115 from that in the previous trial (Fig. 7). This evidence is partially consistent with extant  
116 literature on random rewards [1, 6, 15] and suggests that irrespective of whether  
117 participants are informed of reward randomness explicitly or implicitly, reward priming  
118 influences behaviors.

119 Previous studies in visual search task showed that reward priming accelerates  
120 response speed with implicit knowledge of rewards [6, 16, 17]. However, our result  
121 showed that reward priming did not accelerate response speed when the stimulus was  
122 the same as in the one in the previous trial. This discrepancy suggests that reward  
123 priming enhancement depends on the knowledge of rewards rather than actual rewards  
124 or performance; that is, the facilitation by reward priming is driven by top-down  
125 process.

126 On the contrary, reward priming suppressed the participants' responses when the  
127 stimulus was different from the one in the previous trial. This concurs with extant  
128 literature on reward priming [1, 3, 5, 6]. The reward priming inhibition may influence  
129 decisions independent of the knowledge of rewards; the inhibition of reward priming is  
130 modulated by actual reward size; that is, the suppression by reward priming is driven by  
131 bottom-up process. Therefore, there is a possibility that reward priming comprises

132 partially distinct processes. While it is possible that these results are task-dependent,  
133 several experimental tasks have shown reward-driven effects [5, 15, 18, 19], suggesting  
134 that the effects of reward priming are based on a domain-general mechanism.

## 135 **5 CONCLUSION**

136 This study revealed that the enhancement and inhibition of reward priming could be  
137 partially distinct processes owing to the knowledge of rewards. This result suggests the  
138 effect of reward priming consists of top-down and bottom-up processes. The findings  
139 extend the comprehension of reward priming in relation to explicit knowledge of rewards,  
140 auditory domain, and perceptual decisions. It is recommended that future research  
141 explore how aspects related to reward priming modulate perceptual decisions.

## 142 **ACKNOWLEDGMENT**

143 We would like to express our gratitude toward Yuma Osako for his valuable advice  
144 regarding the experimental design.

145

146 **REFERENCES**

- 147 [1] Anderson BA, Laurent PA, Yantis S (2011) Value-driven attentional capture. Proc  
148 Natl Acad Sci U S A 108:10367–10371
- 149 [2] Anderson BA (2019) Neurobiology of value-driven attention. Curr Opin Psychol  
150 29:27–33
- 151 [3] Della Libera C, Chelazzi L (2006) Visual selective attention and the effects of  
152 monetary rewards. Psychol Sci 17:222–227
- 153 [4] Failing M, Theeuwes J (2018) Selection history: How reward modulates selectivity  
154 of visual attention. Psychon Bull Rev 25:514–538
- 155 [5] Kim AJ, Lee DS, Anderson BA (2021) Previously reward-associated sounds  
156 interfere with goal-directed auditory processing. Q J Exp Psychol 74:1257–1263
- 157 [6] Hickey C, Chelazzi L, Theeuwes J (2010) Reward changes salience in human vision  
158 via the anterior cingulate. J Neurosci 30:11096–11103
- 159 [7] Sali AW, Anderson BA, Yantis S (2014) The role of reward prediction in the control  
160 of attention. J Exp Psychol Hum Percept Perform 40:1654–1664
- 161 [8] Deci EL (1972) The effects of contingent and noncontingent rewards and controls on  
162 intrinsic motivation. Organ Behav Hum Perform 8:217–229
- 163 [9] Della Libera C, Perlato A, Chelazzi L (2011) Dissociable effects of reward on

- 164        attentional learning: from passive associations to active monitoring. *PLoS One*  
165        6:e19460
- 166    [10]Fröber K, Dreisbach G (2014) The differential influences of positive affect, random  
167        reward, and performance-contingent reward on cognitive control. *Cogn Affect*  
168        *Behav Neurosci* 14:530–547
- 169    [11]Stürmer B, Nigbur R, Schacht A, Sommer W (2011) Reward and punishment effects  
170        on error processing and conflict control. *Front Psychol* 2:335
- 171    [12]Sohoglu E, Chait M (2016) Neural dynamics of change detection in crowded  
172        acoustic scenes. *Neuroimage* 126:164–172
- 173    [13]Vallat R (2018) Pingouin: statistics in Python. *J Open Source Softw* 3:1026
- 174    [14]Holland MK, Lockhead GR (1968) Sequential effects in absolute judgments of  
175        loudness. *Percept Psychophys* 3:409–414
- 176    [15]Infanti E, Hickey C, Menghi N, Turatto M (2017) Reward-priming impacts visual  
177        working memory maintenance: Evidence from human electrophysiology. *Vis Cogn*  
178        25:956–971
- 179    [16]Hickey C, van Zoest W (2012) Reward creates oculomotor salience. *Curr Biol*  
180        22:R219-20
- 181    [17]Hickey C, Los SA (2015) Reward priming of temporal preparation. *Vis Cogn* 23:25–

182        40

183    [18] Anderson BA (2016) Value-driven attentional capture in the auditory domain. *Atten*

184        *Percept Psychophys* 78:242–250

185    [19] Hickey C, Peelen MV (2017) Reward Selectively Modulates the Lingering Neural

186        Representation of Recently Attended Objects in Natural Scenes. *J Neurosci*

187        37:7297–7304

188

189 **Figure 1**

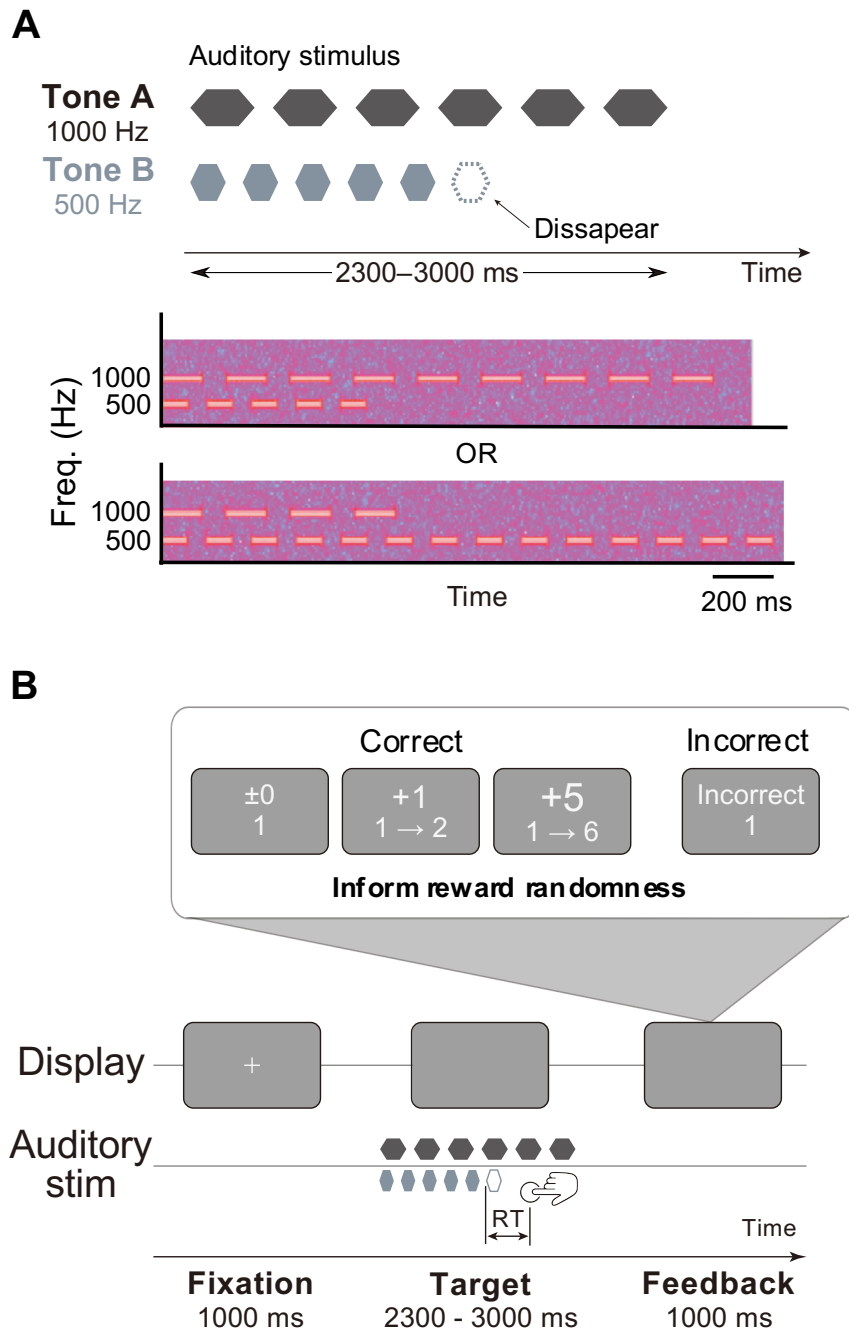

190

191 **Fig. 1.** (A) The structure of sound stimuli and spectrogram. (B) The structure of task

192 paradigm.

193

194 **Figure 2**

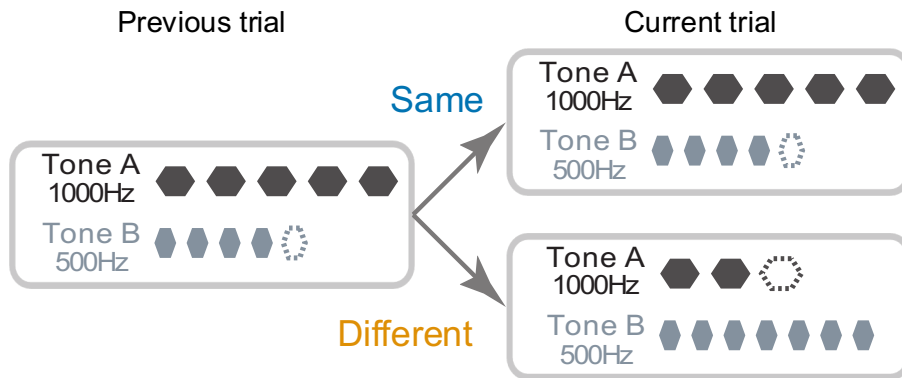

195

196 **Fig. 2.** The conceptual schematics of previous-current stimulus condition.

197

198 **Figure 3**

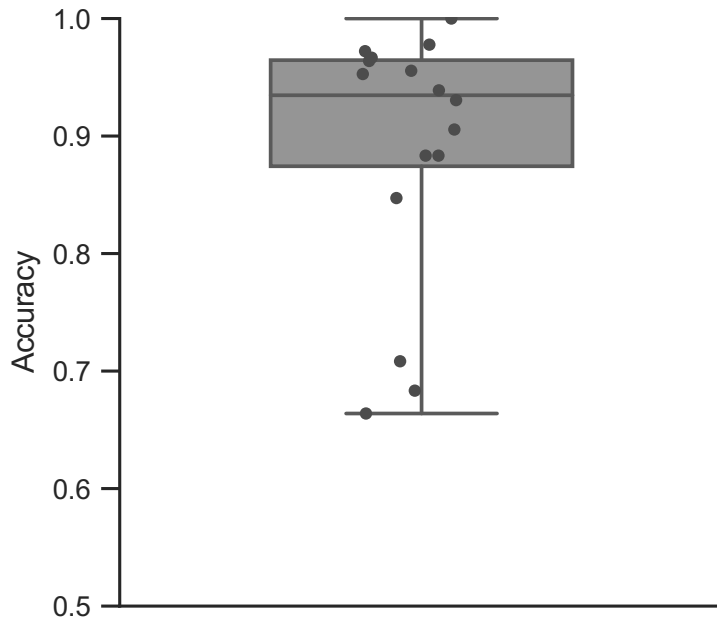

199

200 **Fig. 3.** The boxplot of participant accuracy. Each point represents the accuracy for  
201 individual participants.

202



203 **Figure 4**

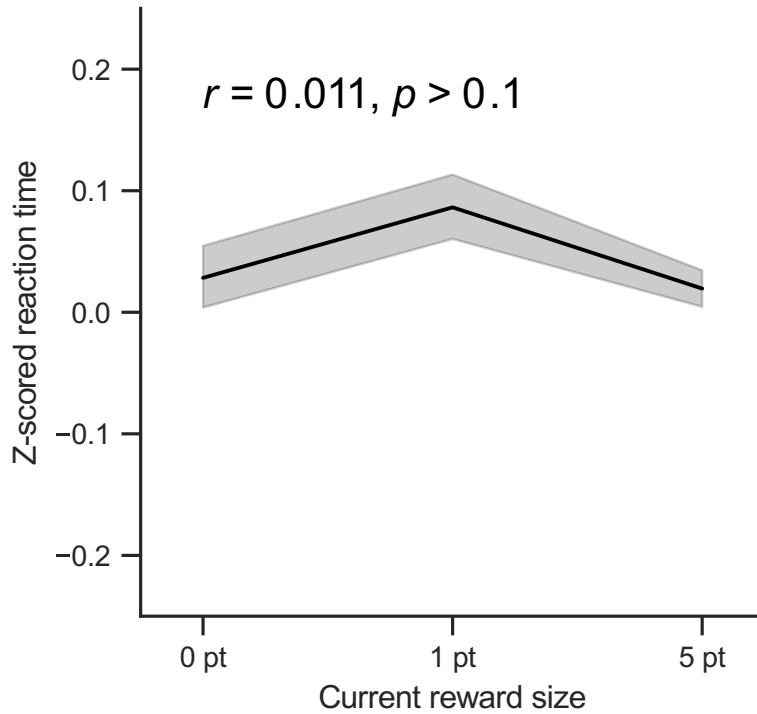

204

205 **Fig. 4.** Mean z-scored reaction time (RT) in current reward size. Shaded areas denote

206 standard error of mean (SEM).

207

208 **Figure 5**

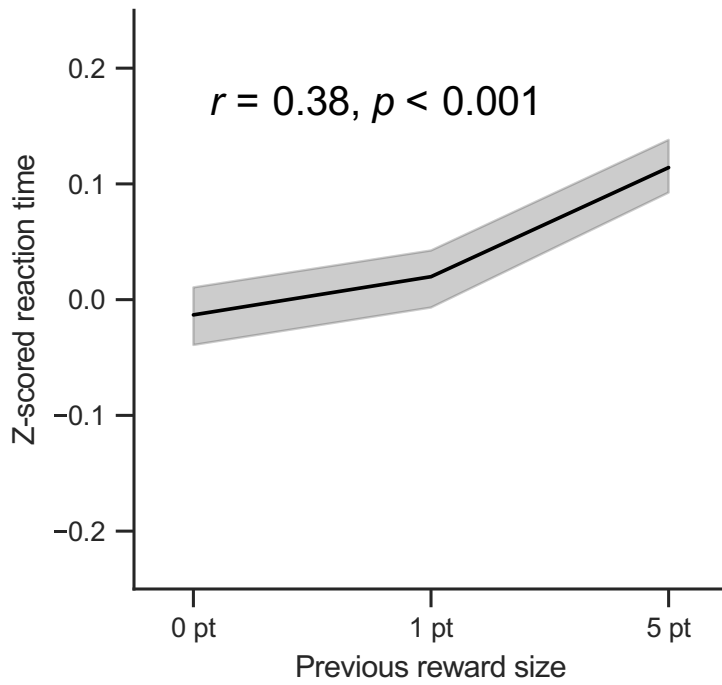

209

210 **Fig. 5.** Mean z-scored RT in previous reward size.

211

212 **Figure 6**

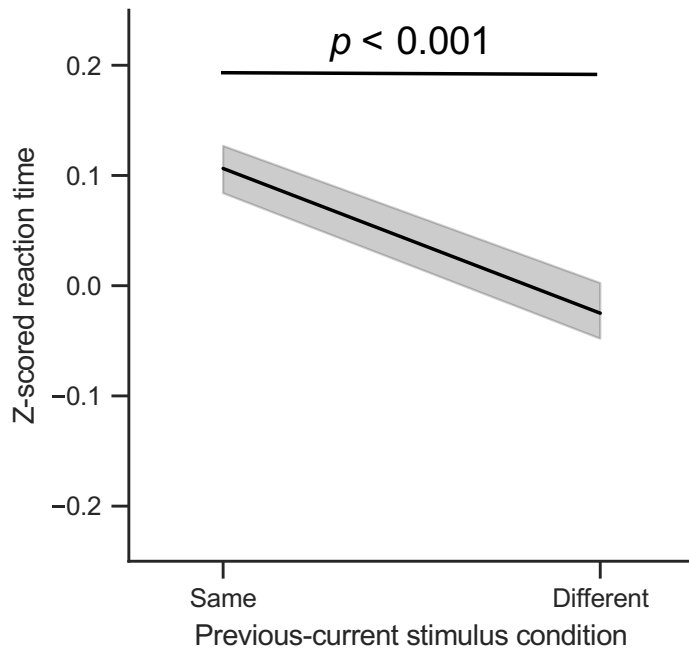

213

214 **Fig. 6.** Mean z-scored RT in previous-current stimulus condition.

215

216 **Figure 7**

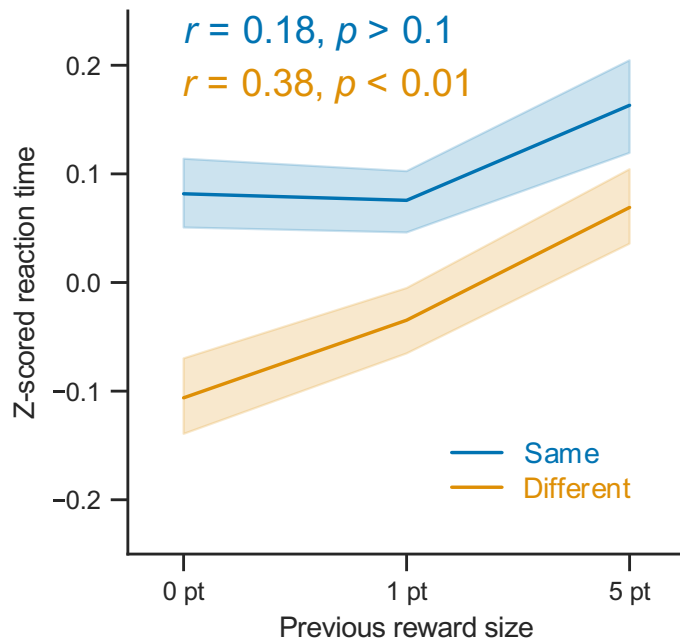

217

218 **Fig. 7.** Mean z-scored RT in previous reward size. Each color corresponds to

219 previous-current stimulus condition.

220
